# Supplementary material for: Single-cell analysis defines highly specific leukemia-induced neutrophils and links MMP8 expression to recruitment of tumor associated neutrophils during FGFR1 driven leukemogenesis
Source: Exp Hematol Oncol. 2024 May 10;13:49. doi: 10.1186/s40164-024-00514-6 (PMC11084112; doi:10.1186/s40164-024-00514-6)
Supplement: Supplementary file 8 — Supplementary Material 8: Supplemental table 2 The most significant Wikipathways in different clusters identified using the AUCell package in the SCENIC workflow. The relative activities of indicated pathways are calculated based on the proportion of expressed genes in the signature and their relative expression value compared to the other genes within the cell. [file 40164_2024_514_MOESM8_ESM.xlsx]

## Sheet: Sheet1
Multivariate analysis using Cox proportional hazard ratio model for MMP8 and MMP9 in AML.
Characteristic	HR1	95% CI1	p-value		Characteristic	HR1	95% CI1	p-value
AGE_AT_DIAGNOSIS	1.0269	1.0165, 1.0374	3.36e-07		AGE_AT_DIAGNOSIS	1.0279	1.0182, 1.0377	1.4e-08
SEX					SEX
Female	—	—			Female	—	—
Male	1.2251	0.8948, 1.6772	0.205		Male	1.2524	0.9214, 1.7024	0.151
IS_RELAPSE					IS_RELAPSE
FALSE	—	—			FALSE	—	—
TRUE	0.9903	0.4574, 2.1440	0.98		TRUE	0.8731	0.4598, 1.6578	0.678
MMP8_c					MMP9_c
low	—	—			low	—	—
high	1.4648	1.0699, 2.0054	0.017		high	1.0252	0.7561, 1.3902	0.873
1 HR = Hazard Ratio, CI = Confidence Interval					1 HR = Hazard Ratio, CI = Confidence Interval
Multivariate analysis using Cox proportional hazard ratio model for MMP8 and MMP9 in KIRC.
Characteristic	HR1	95% CI1	p-value		Characteristic	HR1	95% CI1	p-value
AGE	1.0334	1.0186, 1.0485	8.32e-06		AGE	1.0355	1.0206, 1.0506	2.42e-06
SEX					SEX
Female	—	—			Female	—	—
Male	0.9164	0.6625, 1.2676	0.598		Male	0.9317	0.6740, 1.2878	0.668
AJCC_PATHOLOGIC_TUMOR_STAGE					AJCC_PATHOLOGIC_TUMOR_STAGE
STAGE I	—	—			STAGE I	—	—
STAGE II	1.2374	0.6459, 2.3706	0.521		STAGE II	1.3255	0.6930, 2.5349	0.394
STAGE III	2.5978	1.7123, 3.9411	7.15e-06		STAGE III	2.4604	1.6091, 3.7618	3.24e-05
STAGE IV	7.0138	4.7060, 10.453	2e-16		STAGE IV	6.8184	4.5587, 10.198	2e-16
MMP8_c					MMP9_c
low	—	—			low	—	—
high	1.556	1.1359, 2.1314	0.00589		high	1.3648	0.9961, 1.8701	0.053
1 HR = Hazard Ratio, CI = Confidence Interval					1 HR = Hazard Ratio, CI = Confidence Interval
